# Supplementary material for: Dynamic oropharyngeal and faecal microbiota during treatment in infants hospitalized for bronchiolitis compared with age-matched healthy subjects
Source: PubMed Central journal article supplement (PMC5595837; doi:10.1038/s41598-017-11311-z), 2017-09-12
Supplement: 41598_2017_11311_MOESM1_ESM.pdf [file 41598_2017_11311_MOESM1_ESM.pdf]

**Title:** Dynamic oropharyngeal and faecal microbiota during treatment in infants hospitalized for bronchiolitis compared with age-matched healthy subjects

Qian Hu<sup>3,#</sup>, Wenkui Dai<sup>2,#</sup>, Qian Zhou<sup>4,#</sup>, Dan Fu<sup>5</sup>, Yuejie Zheng<sup>3</sup>, Wenjian Wang<sup>3</sup>, Yanhong Liu<sup>4</sup>, Qin Yang<sup>3</sup>, Dongling Dai<sup>6</sup>, Sixi Liu<sup>1</sup>, Guosheng Liu<sup>7</sup>, Shuaicheng Li<sup>2</sup>, Feiqiu Wen<sup>1,\*</sup>

**Supplementary Figure 1. Dynamic FM of pediatric patients during therapy.**

**A:** AF and CF represent samples taken from diseased children before and after treatment. The 2<sup>nd</sup> sample was removed because lack of post-treatment data. Star signed below the patient number means Shannon index change >50%. **B:** The log<sub>10</sub> value of relative abundance was calculated and described in different colors. The X-axis provides the samples' ids. The Y-axis shows accumulated genera at different stages (A: 24 h after hospitalization; C: clinically recovered).

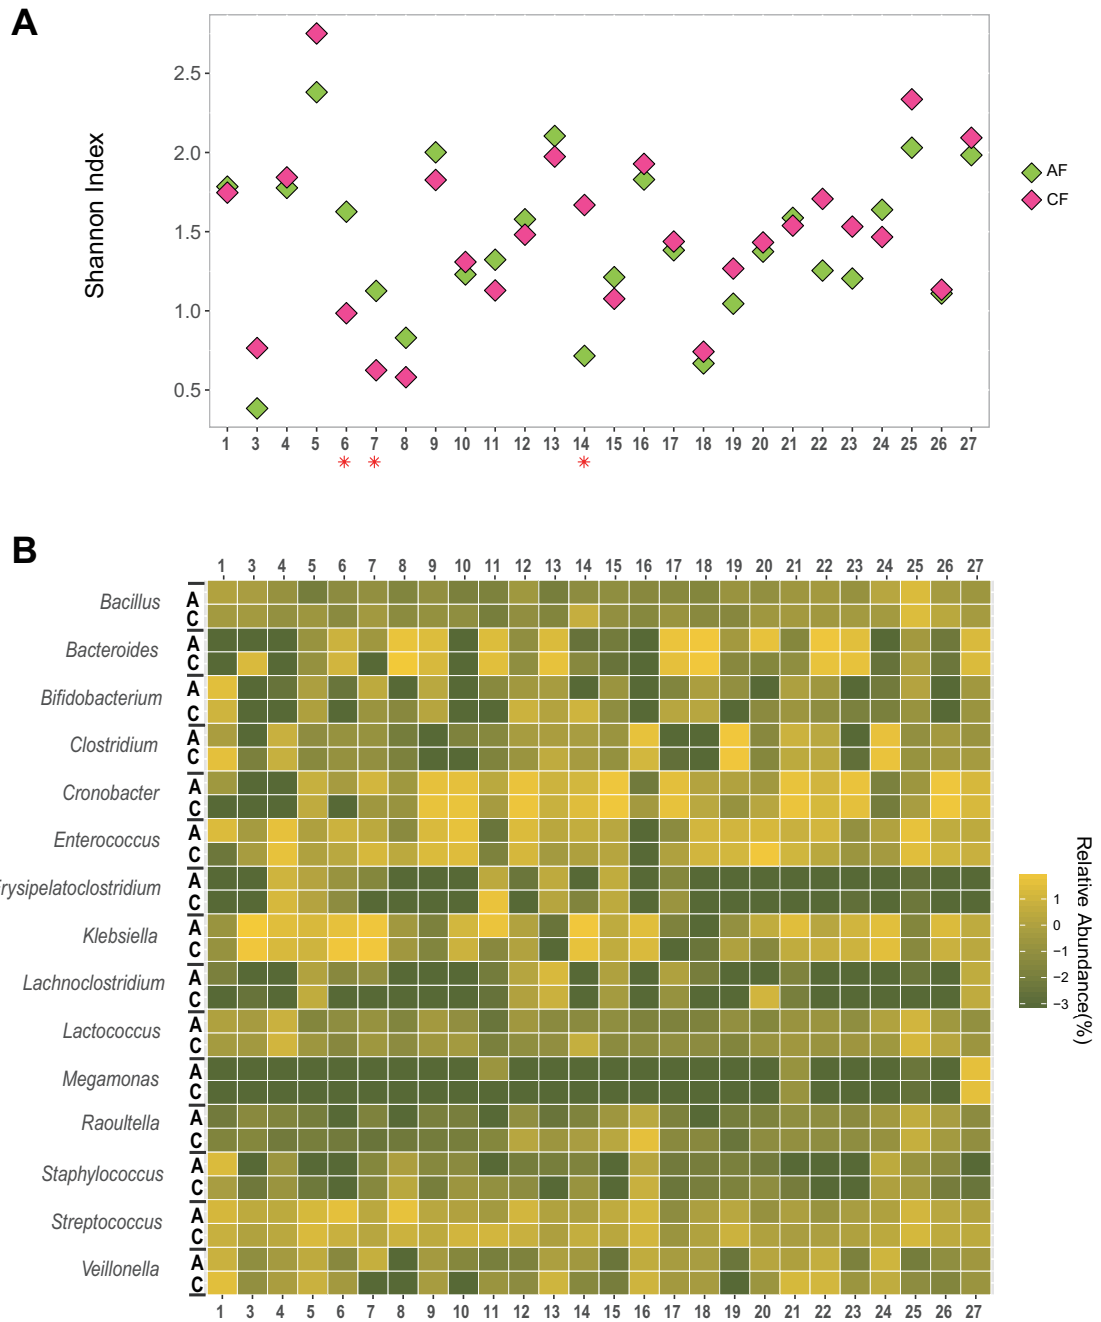

**Supplementary Figure 2. Dynamic OP microbiota of pediatric patients**

**during therapy.** **A:** AP and CP represent samples taken from children before and after treatment, respectively. The Y-axis shows the Shannon index (alpha-diversity) and the X-axis shows the sample id. Star signed below the patient number means Shannon index change >50%. **B:** The log<sub>10</sub> value of relative abundance was calculated and described in different colors. The X-axis
